# Supplementary material for: Wastewater from the Edible Oil Industry as a Potential Source of Lipase- and Surfactant-Producing Actinobacteria
Source: MDPI journal article supplement (doi:10.3390/microorganisms9091987), 2021-09-18
Supplement: s1 [file s1]

# Wastewater from the edible oil industry as a potential source of lipase- and surfactant-producing actinobacteria

Pamela Welz<sup>1</sup>, Gustav Swanepoel<sup>1</sup>, Shandré Weels<sup>1</sup> and Marilize Le Roes-Hill<sup>1,\*</sup>

<sup>1</sup> Applied Microbial and Health Biotechnology Institute, Cape Peninsula University of Technology, PO Box 1906, Bellville, 7535, South Africa; WelzP@cput.ac.za; swangustav@gmail.com; shandrelavern@gmail.com; LeroesM@cput.ac.za

\* Correspondence: Leroesm@cput.ac.za; Tel.: +27 21 953 8499

## Supplementary information

Lipase and esterase sequences annotated for strains BT3 and BT4

>BT3\_putative\_lipase\_esterase

MGSSRASRPGRGRAGASRTLGRGPCTAEQGPAGPGVAPGPGPSWAGPGPGQGPTGPQYGRAEAAS  
RAEEDDGGRSAERGGARGGGGELPVRAPGGGAGHHGGVVRPGPGPGGGLLRPARSGRGTGHAAG  
RGGARRGVAGRARPAHLAVRGVPGGARVRGGERGVPAQRRAGRRLADTFDDIAAAFDALP  
ELAAEAVPEADPGRTVLTGHSAGGHLALWAAARHVLPAGSPWRLPEAPAVRGVVALAPIADFAT  
SAELNVCGGAFAQLLGEYEERLAHADPTALLPTGMATTLVQGTVDTEVPPAVAEAYADAATAA  
GETPGFTLVGVDVGHFPLIDPASAACALVAEEIAQLAW

>BT3\_putative\_esterase

MSTMWQGCCLAHTDYFEMRSGGGHDYGIWVTPPGYDAAVAQAPVVYVLDGNWTVGLTAPLIVT  
QLDPMQSIRPYIQVSVGYAGKEAEHWERLRNRDLVPPGEPIAKEYVDAVEMSVETGTTTRDQADA  
YLAELSNSRGMFLDFTDDLHPRIARDWGAAPNGHGLFGYSYGGFLSLYAWLTRSTFFESVGAGS  
PGVVDTSQVFARLQAMGDALPATRLHVTFNERELLGDIQNLAKNAATFLHRLTARGGPVTS  
ALLHETHVTGLQASFLSYLRTCRAQ

>BT3\_lipase

MQSTPRTGTTTPPTRRTRRLAGTAAVAAVVSLTTLSTPGAHAADNPYERGPAPTRASIEAPRG  
PYAVSQTSSVLLVSGFGGGTIYYPTSTSDGTFGAVVVTPGFTATESSMAWLGPRLASQGFVFTIDT  
LTTLDQPDSRGRQMLAALDYLTERSSARTRIDGTRLGVIGHSMGGGGTLEAAKSRLKAAIPLTPW  
NLDKWTPEVTTPTLVVGADGDTVAPVATHAKPFYSTLPSTTDRAYLELNNATHFAPNISNTTIKY  
SVSWLKRFIDDTRYEQFLCPLPEPDRDIEEYRGTCPSVADGRPLARPKWRTARFRTGLRTRNLPGM  
TGEESALPTVRLHGRAPQLSRIRAWWHQPPAHRSAALLVAGEPGLGRTAVLRWAARALGADSTGH  
LVAGPAPA

>BT3\_esterase\_lipase

MPAPCLVWFHGGGMVLGTPETDDARVSAYARDVGCVVVSAEYRPAEPHPVPVEDCYRALGW  
TAGQAKALGVDPHRLAVGGISAGGGLAAATALLARDRGGPALAFQLLCPMLDDRNTTPSSREFS  
RAVAWPRADNLFGWSALLGPLAGTGRVPPHAAPARAADLSGLPAASVDVGELEVFRDECARYAL  
RLAEAGVPAELRLSPGAFHGFDFGILPQVTLSRRAAAEQVAALRRALGGC

>BT3\_putative\_esterase

MNDTAEATGHPAPDEQDPAPEPVAHVHGTVAPGYEPVRDAFARNFAQLGDRGAAVTVHRHGSPV  
VDLWAGTRDHDSTAPWERGTAQVVHVSVTKGVSAAAALLLHQGRGLDLDAPVSTYWPEYAAEGK  
ERTLVRHLLAHRAGVPVLDRLTPDEAAHPGTGAAAVAAQAPVWEPGTEHGYHAQTYSWLTGE  
LVRRVTGISLGRYVAEEIAGPLGLDLWIGLPPAQKDRVGRSGAVSAPERGGGLRLRPRNVQDAYG  
DPASLTRRAFDVDPADENSPAYHAAELPGANGIATAYALSRFYASLIGAVEQGPRLFAPATLAL  
ARTVESEGPDRVLVVPTRFGPGFMLHGAASPLLAEGSFHGHPGRGGSGLGFADPESGVAFGYVTNGLQ  
KTVTNDPRAQALVRAVRGVLCG

>BT3\_putative\_lipase

MASQLPPPPDPYLETAAKELAEATDPHPRIYEVPPAQGRDILAGLQSGEGVERPEVDEEWVTVDAG  
QWGQVRTRIIRPKGATGPLPVFYIHGAGWVFGDENTHDLRFRELTGAGAAGVFPVYDRAPEAQ  
YPTQVEQNYAVGQWVLQGAEHGLDTSRIA VTGESVGGAMSAVF AIMNKERGGIDLCGQVLLYP  
VANADFGTPSYLQFAEGYYLTRDGMKWFWDQYAPNPAHRTEVYASPLQATTEQLRGLPPALVVT  
DEADVLRDEGEAYAARLREAGVDVTAVRVAGMVHDFLLDSLRLDTRAANVARHLAIDALTKAL  
HD

>BT3\_putative\_lipase

MLYSPGLQVSRTLGTATAIELASRGYVVVAVDHTYEAPAVEFPGGRVEPQQPMSGTGDLKKMVET  
RVGDTRFVLDQLATGRGLPERLGKALDLERVGMYGHSGGGATAAEAMRVDRRIDAGINMDGTLLQ  
YDDTDFLPVAREGLDRPFMLMGKPGQSHLVKASWRSFWDRSTGWKRDLSLTRGSHFSYTDASQSFV  
PALDEHLDIPGPLREQYIGTVDPVRSTAAQRAYIAAFFDQHLRQRPQELLDGPAAHPEVRFVD

>BT3\_putative\_esterase

MSTSRRPTRRGVLKAAAGLTATTALGATSVLASASAAHAAGDGFGLRIVDRNESDARMWYYRFAT  
DAIGWDPGVNVLLPDGYHAGGRRYPVLYLFHGGGTGQDFITFDRMGIRAWTAGKPLIVVMPDGG  
PAGWYSNPVSSNVGPRNWETFHIAQLLPWIDANFRTYAEYDGRAVSGFSMGGFGALKYAAKYYG  
HFASVSSHSGPASLRRDAGLVTHWANVSSAAVELGGGTVYGAPLWDEARVSADNPVQRVESYRN  
KRVFLVAGTSPDPVNWFDTVNETQVLAGQREFKSVLGAAGIPHEGHEVPGGHFVRPDLFIRDLDGI  
VARLRKA

>BT3\_putative\_esterase

MCTVEIGGWADEGFGGVADVRENFDVFGELGTAVSVRAGGRPVELWGGVADERSGRPWDQE  
TVVPVFSCAKGLVSIHAHLLAQQGRDLDPVAAYWPEFAAEGKERITTRMVLGHRAGVPVLDRT  
VSFGEITEWTPVVRAIEEQRLWEPGEAYEYHGHVFGFLVGEVIRITGLTPGRFFREAVGGPLGLRT  
WIGLPAAERGLARLVEAEGRPAGDPQSLLMRIVTMNGALVFPGLEEPHGFNDPELLGTLPAGAG  
AVASASGLAALYGA AVTGLDGGPRLSEETLDAVREVSAGPTWQGYDLGQRWGSGLLDSEPR  
PMLGGRSFGNDGAGGQFAFGDDEFGVGFAVANRMIGHGDDRANRLITALRGSLKA

>BT3\_putative\_esterase\_lipase

MPVLPGAEPYRHDGGPTGVLLCHGFTGTPQSMRPWAEDLAARGHTVSLPLPGHGTRWEDLQLT  
GWQDWYAEVDRALGELLARCERYVAGLSMGGALALRLAARHGDAVRGVVVVNPANKVHGLS  
AYALPAARHLVRTTKGLVSDIALEGSEEVGYHRVPLHAAHSLRNFFRLVDAELPQVTQPLLLRSR  
DHVVPADSARVLGRVSSRDVTEILLQNSFHVATLDHDAPRVFEESAFLARTGANGADSRPEGEA  
VSG

>BT4\_putative\_esterase

MSTMWQGCLAHTDYFEMRSGGGHDYGIWVTPPGHDAAVAQAPVVYVLDGNWTVGLTAPLIVT  
QLDPMQSIQVYQVSVGYAGKEAEHWERLRNRDLVPPGEPIAKEYVDAVEMSVETGTTTRDQADA  
YLAELSNSRGMFLDFTDDLHPRIARDWGAAPNGHGLFGYSYGGGLFSLYAWLTRSTFFESVGAGS

PGVVDTSQVFARLQAMGDALPATRLHVTFNERELLGDIQVYQNLAKNAATFLHRLTARGGPVTS  
ALLHETHVTGLQASFLSYLRTCRAQ

>BT4\_putative\_esterase

MCTVEIGGWADEGFGGVADVDFRENFDFVFGELGTAVSVRAGGRPVELWGGVADERSGRPWDQE  
TVVPVFSCAKGLVSIHAHLLAQQGRLLDAPVAAYWPEFAAEGKERITTRMVLGHRAGVPVLDRT  
VSFGEITEWTPVVRAIEEQRPLWEPGEAYEYHGHVFGFLVGEVIRITGLTPGRFFREAVGGPLGLRA  
WIGLPAAERGLARLVEAEGRPAGDPQSLLMRIVTMNGALVFPGLEEPHGFNDPELLGTPLGAG  
AVASASGLAALYGA AVTGLDGGPRLLSEETLDAVREVSAGPTWQGYDLGQRWGSGLDSDGRPR  
PMLGGRSFGNDGAGGQFAFGDDEFVGFAYVANRMIGHGDDRANRLITALRGSKA

>BT4\_putative\_lipase\_esterase

MGAARSAAEREAEESSLFHPEAAPDTPVAYGPDQVDFYAPRGPGAAPGTPLVVVVHGA  
WRAAHDRHLHISFPAFLAGRGFAVASVEYRRGNGGQVAGRWPDTFDDIAAFDALPELAAEAVP  
EADPGRTVLTGHSAGGHLALWAAARHVLPAAGSPWRLPEAPAVRGVVALAPIADFATSALNVCG  
GAFAQLLGEEYEERLAHADPTALLPTGMATTLVQGTVDTEVPPAVAEAYADAATAAGETPGFTLV  
DGVGHFPLDPASAACALVAEEIAQLAW

>BT4\_lipase

MQSTPRTGTTTTPPTRTRTRRLAGTAAVA AVVSLTTLSTPGAHAADNPYERGPAPTRASIEAPRG  
PYAVSQTSVSLLVSGFGGGTIYYPTSTSDGTFGAVVVTPGFTATESSMAWLGPRLASQGFVFTIDT  
LTTLDQPDSRGRQMLAALDYLTERSSARTRIDGTRLGVIGHSMGGGGTLEAAKSRLKAAIPLTPW  
NLDKTWPEVTTPTLVVGADGDTVAPVATHAKPFYSTLPSTTDRAYLELNNATHFAPNISNTTIKY  
SVSWLKRFIDDTRYEQFLCPLPEPDRDIEEYRGTCPSVADGRPLARPKWRTARFRTGLRTRNLPGM  
TGEESALPTVRLHGRAPQLSRIRAWWHQPPAHRSAALLVAGEPGLGRTAVLRWAARALGADSTGH  
LVAGRPPPHQDV

>BT4\_esterase\_lipase

MVSAEYRPAPEHPVPVEDCYRALGWTAGQAKALGVDPHRLAVGGISAGGGLAAATALLARD  
RGGPALAFQLLCPMLDDRNTTPSSREFSRAVAWPRADNLFGWSALLGPLAGAGRVPPHAAPAR  
AADLSGLPAASVDVGELEVRDECARYALRLAEAGVPAELRLSPGAFHGFDFGALPQVTLSSRAAA  
EQVAALRRALGGC

>BT4\_putative\_esterase

MSTSRPTRRGVLKAAAGLTATTALGATSVLASASAAHAAGDGFGLRIVDRNESDARMWYYRFAT  
DAIGWDPGVNVLLPDGYHAGGRRYPVLYLFHGGGTGQDFITFDRMGIRAWTAGKPLIVVMPDGG  
PAGWYSNPVSSNVGPRNWETFHIAQLLPWIDANFRTYAEYDGRAVSGFSMGGFGALKYAAKYYG  
HFASVSSHSGPASLRDAGLVTHWANVSSAAVELGGGTVYGAPLWDEARVSADNPVQRVESYRN  
KRVFLVAGTSPDPVNWFDTVNETQVLQAGQREFKSVLGAAGIPHEGHEVPGGHFVRPDLFIRDLGI  
VARLRKA

>BT4\_putative\_esterase\_lipase

MPVLPGAEPYRHDGGPTGVLLCHGFTGTPQSMRPWAEDLAARGHTVSLPLLPGHGTRWEDLQLT  
GWQDWYAEVDRLGELLARCERYVAGLSMGGALALRLAARHGDAVRGVVVVNPANKVHGLS  
AYALPAARHLVRTTKGLVSDIALEGSEEVGYHRVPLHAAHSLRNFFRLVDAELPQVTQPLLLRSR  
DHVPPADSARVLGRVSSRDVTEILLQNSFHVATLDHDA PRVFEESSAFLARTGANGADSRPEGEA  
VSG

>BT4\_putative\_esterase

MNDTAEATGHPAPDEQDPAPPEPVAHVHGTVA PGYEPVRDAFARNFAQLGDRGAAVTVHRHGSPV  
VDLWAGTRDHDSTAPWERGTAQVVH SVTKGVSA AALLLHQ RGRLDLDAPVSTYWPEYAAEGK  
ERTLVRHLLAHRAGVPVLD RPLTPDEAAHPGTGAAAVAAQAPVWEPGTEHGYHAQTYSWLTGE  
LVRRVTGISLGRYVAEEIAGPLGLDLWIGLPPAQKDRVGRSGAVSAPERGGGLRLRPRRNVQDAYG  
DPASLTRRAFDVADPPADENSPAYHAAELPGANGIATAYALSRFYASLIGAVEQGPRLFAPATLAL  
ARTVESEGPDRVLVVPTRFGPGFMLHGAASPLLAEGSFGHPGRGGS LGFADPESGVAFGYVTNGLQ  
KTVTNDPRAQALVRAVRGV LQG

>BT4\_putative\_lipase

MLYSPGLQVSRTLGTATAIELASRGYVVVA VDHTYEAPAVEFPGGRVEPQQPMSGTGDLKKMVET  
RVGDTRFVLDQLATGRGLPERLGKALDLERVGMYGHSGGGATAAEAMRVDRRIDAGINMDGTLQ  
YDDTDFLPVAREGLDRPFMLMGKPGQSHLVKASWRSFWDRSTGWKRDL SLTRGSHFSYTDAQSFV  
PALDEHLDIPGPLREQYIGTVDPVRSTAAQRAYIAAFFDQH LRQRPQELLDGPSAAHPEVRFVD

>BT4\_putative\_lipase

MASQLPPPPDPYLETAAKELAEATD PHPRIYEVPPAQGRDILAGLQSGEGVERPEVDEEWVTVDAG  
QWGQVRTRIIRPKGATGPLPVVFIYHGAGWVFGDENTHDRLFRELTVGAGAAGVFPVYDRAPEAQ  
YPTQVEQNYAVGQWVLQHGAEHGLDTSRIAVTGESVGGAMSAVF AIMNKERGGIDLKGQVLLYP  
VANADFGTPSYLQFAEGYYLTRDGMKWFWDQYAPNPAHRTEVYASPLQATTEQLRGLPPALVVT  
DEADVLRDEGEAYAARLREAGVDVTAVRVAGMVHDFLLDSL RDTAANVARHLAIDALTKAL  
HD

**Supplementary Table S1:** Lipases and esterases detected within the annotated genomes of BT3 and BT4. Export signals were detected through SignalP-5.0 analysis.

| Strain | Lipase/Esterase          | BLASTp top hit                              | SignalP likelihood |
|--------|--------------------------|---------------------------------------------|--------------------|
| BT3    | Putative lipase/esterase | <i>Streptomyces</i> alpha/beta hydrolase    | 0.67 (other)       |
|        | Putative esterase/lipase | <i>Streptomyces</i> alpha/beta hydrolase    | 0.97 (other)       |
|        | Lipase                   | <i>Streptomyces</i> diene lactone hydrolase | 0.60 (TAT)         |
|        | Esterase/lipase          | <i>Streptomyces</i> alpha/beta hydrolase    | 0.70 (other)       |
|        | Putative esterase        | <i>Streptomyces</i> serine hydrolase        | 0.96 (other)       |
|        | Putative lipase          | <i>Streptomyces</i> alpha/beta hydrolase    | 0.98 (other)       |
|        | Putative lipase          | <i>Streptomyces</i> lipase                  | 0.88 (other)       |
|        | Putative esterase        | <i>Streptomyces</i> esterase                | 0.93 (TAT)         |
|        | Putative esterase        | <i>Streptomyces</i> beta-lactamase          | 0.98 (other)       |
|        | Putative esterase        | <i>Streptomyces</i> alpha/beta hydrolase    | 0.96 (other)       |
| BT4    | Putative esterase        | <i>Streptomyces</i> alpha/beta hydrolase    | 0.97 (other)       |
|        | Putative esterase        | <i>Streptomyces</i> beta-lactamase          | 0.98 (other)       |
|        | Putative lipase/esterase | <i>Streptomyces</i> alpha/beta hydrolase    | 0.96 (other)       |
|        | Lipase                   | <i>Streptomyces</i> diene lactone hydrolase | 0.60 (TAT)         |
|        | Esterase/lipase          | <i>Streptomyces</i> alpha/beta hydrolase    | 0.82 (other)       |
|        | Putative esterase        | <i>Streptomyces</i> esterase                | 0.93 (TAT)         |
|        | Putative esterase/lipase | <i>Streptomyces</i> alpha/beta hydrolase    | 0.97 (other)       |
|        | Putative esterase        | <i>Streptomyces</i> serine hydrolase        | 0.96 (other)       |
|        | Putative lipase          | <i>Streptomyces</i> lipase                  | 0.88 (other)       |
|        | Putative lipase          | <i>Streptomyces</i> alpha/beta hydrolase    | 0.98 (other)       |

TAT = Twin arginine translocation signal peptide

**Supplementary Table S2:** Biosynthetic gene clusters detected within the genome sequences of *Streptomyces* sp. BT3 and *Streptomyces* sp. BT4.

| Biosynthetic gene cluster                                                                                              | BT3 (number of clusters present)         | BT4 (number of clusters present)       |
|------------------------------------------------------------------------------------------------------------------------|------------------------------------------|----------------------------------------|
| Butyrolactone                                                                                                          | 1                                        | 1                                      |
| Ectoine                                                                                                                | 1<br><br>1x 100% match: ectoine          | 1<br><br>1x 100% match: ectoine        |
| Lanthipeptide class III                                                                                                | 2                                        | 2                                      |
| Lasso peptide                                                                                                          | 1                                        | 1                                      |
| Linear azol(in)e-containing peptides (LAP)                                                                             | 1                                        | 1                                      |
| Non-ribosomal peptide synthetase (NRPS)                                                                                | 20<br><br>1x 100% match: rhizomide A/B/C | 16                                     |
| NRPS-like                                                                                                              | 4                                        | 3                                      |
| NRPS/RRE-containing                                                                                                    | -                                        | 1                                      |
| NRPS/T1PKS                                                                                                             | 3                                        | 2                                      |
| RRE-element containing cluster (RRE-containing)                                                                        | 2                                        | -                                      |
| Other unspecified ribosomally synthesised and post-translationally modified peptide product (RiPP) cluster (RiPP-like) | 2                                        | 2                                      |
| Siderophore                                                                                                            | 3<br><br>1x 100% match: desferrioxamin   | 3<br><br>1x 100% match: desferrioxamin |
| Terpene                                                                                                                | 8<br><br>1x 100% match: geosmin          | 6<br><br>1x 100% match: geosmin        |
| Trans-AT-PKS                                                                                                           | -                                        | 1                                      |
| Type 1 Polyketide synthase (T1PKS)                                                                                     | 23<br><br>1x 100% match: 1-heptadecene   | 24<br><br>1x 100% match: 1-heptadecene |
| T1PKS/terpene                                                                                                          | -                                        | 1                                      |
| Type 3 Polyketide synthase (T3PKS)                                                                                     | 1                                        | 1                                      |

**Supplementary Table S3:** CAzymes predicted to be present in the genomes of *Streptomyces* sp. BT3 and *Streptomyces* sp. BT4 (predicted by dbCAN2). Only CAzymes predicted by all three algorithms are listed.

| CAzymes predicted                                                                                                                                                                                                                                                                                                                                                         | <i>Streptomyces</i><br>sp. BT3 | <i>Streptomyces</i><br>sp. BT4 |
|---------------------------------------------------------------------------------------------------------------------------------------------------------------------------------------------------------------------------------------------------------------------------------------------------------------------------------------------------------------------------|--------------------------------|--------------------------------|
| Auxiliary activity family 3<br>cellobiose dehydrogenase; glucose 1-oxidase; aryl alcohol oxidase; alcohol oxidase; pyranose oxidase                                                                                                                                                                                                                                       | AA3 (1)                        | AA3 (1)                        |
| Auxiliary activity family 10<br>Copper-dependent lytic polysaccharide monooxygenases (LPMOs); some proteins have been shown to act on chitin, others on cellulose; lytic cellulose monooxygenase (C1-hydroxylating); lytic cellulose monooxygenase (C4-dehydrogenating); lytic chitin monooxygenase; lytic xylan monooxygenase / xylan oxidase (glycosidic bond-cleaving) | AA10 (3)                       | AA10 (3)                       |
| Carbohydrate-binding module family 2<br>This module has been found to bind cellulose, chitin or xylan                                                                                                                                                                                                                                                                     | CBM2 (2)                       | CBM2 (2)                       |
| Carbohydrate-binding module family 3<br>Binds to cellulase; one report of binding to chitin                                                                                                                                                                                                                                                                               | CBM3 (1)                       | CBM3 (1)                       |
| Carbohydrate-binding module 6<br>The cellulose-binding function has been demonstrated in one case on amorphous cellulose and $\beta$ -1,4-xylan. Some of these modules also bind $\beta$ -1,3-glucan, $\beta$ -1,3-1,4-glucan, and $\beta$ -1,4-glucan.                                                                                                                   | CBM6 (2)                       | CBM6 (2)                       |
| Carbohydrate-binding module 13<br>Often found in association with xylanase                                                                                                                                                                                                                                                                                                | CBM13 (4)                      | CBM13 (4)                      |
| Carbohydrate-binding module family 20<br>Starch-binding CBM, strongly interacts with cyclodextrins                                                                                                                                                                                                                                                                        | CBM20 (1)                      | CBM20 (1)                      |
| Carbohydrate-binding module family 32<br>Binds galactose and lactose, polygalacturonic acid, and LacNAc ( $\beta$ -D-galactosyl-1,4- $\beta$ -D-N-acetylglucosamine)                                                                                                                                                                                                      | CBM32 (3)                      | CBM32 (2)                      |

| <b>CAzymes predicted</b>                                                                                                                                                                                            | <b><i>Streptomyces</i><br/>sp. BT3</b> | <b><i>Streptomyces</i><br/>sp. BT4</b> |
|---------------------------------------------------------------------------------------------------------------------------------------------------------------------------------------------------------------------|----------------------------------------|----------------------------------------|
| Carbohydrate-binding module family 35<br>Binds to xylan, mannoooligosacchardies, $\beta$ -galactan                                                                                                                  | CBM35 (1)                              | CBM35 (1)                              |
| Carbohydrate-binding module family 42<br>Found mostly at the C-terminus of GH54 catalytic domains; binds to arabinofuranose                                                                                         | CBM42 (1)                              | CBM42 (1)                              |
| Carbohydrate-binding module family 48<br>Glycogen-binding module usually in association with GH13 modules                                                                                                           | CBM48 (1)                              | CBM48 (2)                              |
| Carbohydrate esterase family 1<br>acetyl xylan esterase; cinnamoyl esterase; feruloyl esterase; carboxylesterase; S-formylglutathione hydrolase; diacylglycerol O-acyltransferase; trehalose 6-O-mycolyltransferase | CE1 (1)                                | CE1 (1)                                |
| Carbohydrate esterase family 4<br>acetyl xylan esterase; chitin deacetylase; chitooligosaccharide deacetylase; peptidoglycan GlcNAc deacetylase; peptidoglycan N-acetylmuramic acid deacetylase                     | CE4 (3)                                | CE4 (3)                                |
| Carbohydrate esterase family 7<br>acetyl xylan esterase; cephalosporin-C deacetylase                                                                                                                                | CE7 (1)                                | CE7 (1)                                |
| Carbohydrate esterase family 9<br>N-acetylglucosamine 6-phosphate deacetylase; N-acetylglucosamine 6-phosphate deacetylase                                                                                          | CE9 (1)                                | CE9 (1)                                |
| Carbohydrate esterase family 14<br>N-acetyl-1-D-myo-inositol-2-amino-2-deoxy- $\alpha$ -D-glucopyranoside deacetylase;<br>diacetylchitobiose deacetylase; mycothiol S-conjugate amidase                             | CE14 (2)                               | CE14 (2)                               |
| Glycoside hydrolase family 1                                                                                                                                                                                        | GH1 (4)                                | GH1 (4)                                |

| <b>CAzymes predicted</b>                                                                                                                                                                                                                                                                                                                                                                                                                                                                                                                                         | <b><i>Streptomyces</i><br/>sp. BT3</b> | <b><i>Streptomyces</i><br/>sp. BT4</b> |
|------------------------------------------------------------------------------------------------------------------------------------------------------------------------------------------------------------------------------------------------------------------------------------------------------------------------------------------------------------------------------------------------------------------------------------------------------------------------------------------------------------------------------------------------------------------|----------------------------------------|----------------------------------------|
| β-glucosidase; β-galactosidase; β-mannosidase; β-glucuronidase; β-xylosidase; β-D-fucosidase; phlorizin hydrolase; exo-β-1,4-glucanase; 6-phospho-β-galactosidase; 6-phospho-β-glucosidase; strictosidine β-glucosidase; lactase; amygdalin β-glucosidase; prunasin β-glucosidase; vicianin hydrolase; raucaffricine β-glucosidase; thioglucosidase; β-primeverosidase; isoflavonoid 7-O-β-apiosyl-β-glucosidase; ABA-specific β-glucosidase; DIMBOA β-glucosidase; β-glycosidase; hydroxyisourate hydrolase; β-rutinosidase /α-L-rhamnose-(1,6)-β-D-glucosidase |                                        |                                        |
| Glycoside hydrolase family 2<br>β-galactosidase; β-mannosidase; β-glucuronidase; α-L-arabinofuranosidase; mannosylglycoprotein endo-β-mannosidase; exo-β-glucosaminidase; α-L-arabinopyranosidase; β-galacturonidase; β-xylosidase; β-D-galactofuranosidase; β-glucosidase                                                                                                                                                                                                                                                                                       | GH2 (2)                                | GH2 (2)                                |
| Glycoside hydrolase family 3<br>β-glucosidase; xylan 1,4-β-xylosidase; β-glucosylceramidase; β-N-acetylhexosaminidase; α-L-arabinofuranosidase; glucan 1,4-β-glucosidase; isoprimeverose-producing oligoxyloglucan hydrolase; coniferin β-glucosidase; exo-1,3-1,4-glucanase; β-N-acetylglucosaminide phosphorylases; β-1,2-glucosidase; β-1,3-glucosidase; xyloglucan-specific exo-β-1,4-glucanase / exo-xyloglucanase                                                                                                                                          | GH3 (5)                                | GH3 (6)                                |
| Glycoside hydrolase family 4<br>maltose-6-phosphate glucosidase; α-glucosidase; α-galactosidase; 6-phospho-β-glucosidase; α-glucuronidase; α-galacturonase; palatinase                                                                                                                                                                                                                                                                                                                                                                                           | GH4 (2)                                | GH4 (2)                                |
| Glycoside hydrolase family 5                                                                                                                                                                                                                                                                                                                                                                                                                                                                                                                                     | GH5 (0)                                | GH5 (1)                                |

| <b>CAzymes predicted</b>                                                                                                                                                                                                                                                                                                                                                                                                                                                                                                                                                                                                                                                                                                                                                                                                                                                                                                                                                                                                         | <b><i>Streptomyces</i><br/>sp. BT3</b> | <b><i>Streptomyces</i><br/>sp. BT4</b> |
|----------------------------------------------------------------------------------------------------------------------------------------------------------------------------------------------------------------------------------------------------------------------------------------------------------------------------------------------------------------------------------------------------------------------------------------------------------------------------------------------------------------------------------------------------------------------------------------------------------------------------------------------------------------------------------------------------------------------------------------------------------------------------------------------------------------------------------------------------------------------------------------------------------------------------------------------------------------------------------------------------------------------------------|----------------------------------------|----------------------------------------|
| endo- $\beta$ -1,4-glucanase / cellulase; endo- $\beta$ -1,4-xylanase; $\beta$ -glucosidase; $\beta$ -mannosidase; $\beta$ -glucosylceramidase; glucan $\beta$ -1,3-glucosidase; exo- $\beta$ -1,4-glucanase / cellodextrinase; glucan endo-1,6- $\beta$ -glucosidase; mannan endo- $\beta$ -1,4-mannosidase; cellulose $\beta$ -1,4-cellobiosidase; steryl $\beta$ -glucosidase; endoglycoceramidase; chitosanase; $\beta$ -primeverosidase; xyloglucan-specific endo- $\beta$ -1,4-glucanase; endo- $\beta$ -1,6-galactanase; $\beta$ -1,3-mannanase; arabinoxylan-specific endo- $\beta$ -1,4-xylanase; mannan transglycosylase; lichenase / endo- $\beta$ -1,3-1,4-glucanase; $\beta$ -glycosidase; endo- $\beta$ -1,3-glucanase / laminarinase; $\beta$ -N-acetylhexosaminidase; chitosanase; $\beta$ -D-galactofuranosidase; $\beta$ -galactosylceramidase; $\beta$ -rutinosidase / $\alpha$ -L-rhamnose-(1,6)- $\beta$ -D-glucosidase; $\alpha$ -L-arabinofuranosidase; glucomannan-specific endo- $\beta$ -1,4-glucanase |                                        |                                        |
| Glycoside hydrolase family 6<br>endoglucanase; cellobiohydrolase; lichenase / endo- $\beta$ -1,3-1,4-glucanase                                                                                                                                                                                                                                                                                                                                                                                                                                                                                                                                                                                                                                                                                                                                                                                                                                                                                                                   | GH6 (4)                                | GH6 (3)                                |
| Glycoside hydrolase family 10<br>endo-1,4- $\beta$ -xylanase; endo-1,3- $\beta$ -xylanase; tomatinase; xylan endotransglycosylase; endo- $\beta$ -1,4-glucanase                                                                                                                                                                                                                                                                                                                                                                                                                                                                                                                                                                                                                                                                                                                                                                                                                                                                  | GH10 (1)                               | GH10 (1)                               |
| Glycoside hydrolase family 13                                                                                                                                                                                                                                                                                                                                                                                                                                                                                                                                                                                                                                                                                                                                                                                                                                                                                                                                                                                                    | GH13 (10)                              | GH13 (10)                              |

| CAzymes predicted                                                                                                                                                                                                                                                                                                                                                                                                                                                                                                                                                                                                                                                                                                                                                                                                                                                                                                                                                                                                    | <i>Streptomyces</i><br>sp. BT3 | <i>Streptomyces</i><br>sp. BT4 |
|----------------------------------------------------------------------------------------------------------------------------------------------------------------------------------------------------------------------------------------------------------------------------------------------------------------------------------------------------------------------------------------------------------------------------------------------------------------------------------------------------------------------------------------------------------------------------------------------------------------------------------------------------------------------------------------------------------------------------------------------------------------------------------------------------------------------------------------------------------------------------------------------------------------------------------------------------------------------------------------------------------------------|--------------------------------|--------------------------------|
| $\alpha$ -amylase; pullulanase; cyclomaltodextrin glucanotransferase; cyclomaltodextrinase; trehalose-6-phosphate hydrolase; oligo- $\alpha$ -glucosidase; maltogenic amylase; neopullulanase; $\alpha$ -glucosidase; maltotetraose-forming $\alpha$ -amylase; isoamylase; glucodextranase; maltohexaose-forming $\alpha$ -amylase; maltotriose-forming $\alpha$ -amylase; branching enzyme; trehalose synthase; 4- $\alpha$ -glucanotransferase; maltopentaose-forming $\alpha$ -amylase; amylosucrase; sucrose phosphorylase; malto-oligosyltrehalose trehalohydrolase; isomaltulose synthase; malto-oligosyltrehalose synthase; amylo- $\alpha$ -1,6-glucosidase; $\alpha$ -1,4-glucan: phosphate $\alpha$ -maltosyltransferase; amino acid transporter; [retaining] sucrose 6(F)-phosphate phosphorylase; [retaining] glucosylglycerol phosphorylase; Glucosylglycerate phosphorylase; [retaining] sucrose $\alpha$ -glucosidase; oligosaccharide $\alpha$ -4-glucosyltransferase; [retaining] $\alpha$ -amylase |                                |                                |
| Glycoside hydrolase family 15<br>glucoamylase; glucodextranase; $\alpha,\alpha$ -trehalase; dextran dextrinase                                                                                                                                                                                                                                                                                                                                                                                                                                                                                                                                                                                                                                                                                                                                                                                                                                                                                                       | GH15 (2)                       | GH15 (1)                       |
| Glycoside hydrolase family 16<br>xyloglucan:xyloglucosyltransferase; keratan-sulfate endo-1,4- $\beta$ -galactosidase; endo-1,3- $\beta$ -glucanase / laminarinase; endo-1,3(4)- $\beta$ -glucanase; licheninase; $\beta$ -agarase; $\kappa$ -carrageenase; xyloglucanase; endo- $\beta$ -1,3-galactanase; [retaining] $\beta$ -porphyranase; hyaluronidase; endo- $\beta$ -1,4-galactosidase; chitin $\beta$ -1,6-glucanosyltransferase; $\beta$ -transglycosidase; $\beta$ -glycosidase; $\beta$ -carrageenase                                                                                                                                                                                                                                                                                                                                                                                                                                                                                                     | GH16 (1)                       | GH16 (1)                       |
| Glycoside hydrolase family 18<br>chitinase; lysozyme; endo- $\beta$ -N-acetylglucosaminidase; peptidoglycan hydrolase with endo- $\beta$ -N-acetylglucosaminidase specificity; Nod factor hydrolase; xylanase inhibitor; concanavalin B; narbonin                                                                                                                                                                                                                                                                                                                                                                                                                                                                                                                                                                                                                                                                                                                                                                    | GH18 (3)                       | GH18 (5)                       |
| Glycoside hydrolase family 19<br>Chitinase; lysozyme                                                                                                                                                                                                                                                                                                                                                                                                                                                                                                                                                                                                                                                                                                                                                                                                                                                                                                                                                                 | GH19 (3)                       | GH19 (3)                       |

| <b>CAzymes predicted</b>                                                                                                                                                                                                                                                                                                                                                                                                                                                                                                                           | <b><i>Streptomyces</i><br/>sp. BT3</b> | <b><i>Streptomyces</i><br/>sp. BT4</b> |
|----------------------------------------------------------------------------------------------------------------------------------------------------------------------------------------------------------------------------------------------------------------------------------------------------------------------------------------------------------------------------------------------------------------------------------------------------------------------------------------------------------------------------------------------------|----------------------------------------|----------------------------------------|
| Glycoside hydrolase family 20<br>$\beta$ -hexosaminidase; lacto-N-biosidase; $\beta$ -1,6-N-acetylglucosaminidase; $\beta$ -6-SO <sub>3</sub> -N-acetylglucosaminidase                                                                                                                                                                                                                                                                                                                                                                             | GH20 (2)                               | GH20 (2)                               |
| Glycoside hydrolase family 23<br>(lysozyme type G, peptidoglycan lyase, chitinase)                                                                                                                                                                                                                                                                                                                                                                                                                                                                 | GH23 (3)                               | GH23 (3)                               |
| Glycoside hydrolase family 25<br>Lysozyme                                                                                                                                                                                                                                                                                                                                                                                                                                                                                                          | GH25 (3)                               | GH25 (3)                               |
| Glycosyl hydrolase family 32<br>invertase; endo-inulinase; $\beta$ -2,6-fructan 6-levanbiohydrolase; endo-levanase; exo-inulinase; fructan $\beta$ -(2,1)-fructosidase/1-exohydrolase; fructan $\beta$ -(2,6)-fructosidase/6-exohydrolase; sucrose:sucrose 1-fructosyltransferase; fructan:fructan 1-fructosyltransferase; sucrose:fructan 6-fructosyltransferase; fructan:fructan 6G-fructosyltransferase; levan fructosyltransferase; [retaining] sucrose:sucrose 6-fructosyltransferase (6-SST); cycloinulo-oligosaccharide fructanotransferase | GH32 (1)                               | GH32 (2)                               |
| Glycoside hydrolase family 33<br>sialidase or neuraminidase; trans-sialidase; anhydrosialidase; Kdo hydrolase; 2-keto-3-deoxynononic acid hydrolase / KDNase                                                                                                                                                                                                                                                                                                                                                                                       | GH33 (1)                               | GH33 (1)                               |
| Glycoside hydrolase family 43<br>$\beta$ -xylosidase; $\alpha$ -L-arabinofuranosidase; xylanase; $\alpha$ -1,2-L-arabinofuranosidase; exo- $\alpha$ -1,5-L-arabinofuranosidase; [invertig] exo- $\alpha$ -1,5-L-arabinanase; $\beta$ -1,3-xylosidase; [invertig] exo- $\alpha$ -1,5-L-arabinanase; [invertig] endo- $\alpha$ -1,5-L-arabinanase; exo- $\beta$ -1,3-galactanase; $\beta$ -D-galactofuranosidase                                                                                                                                     | GH43 (1)                               | GH43 (1)                               |
| Glycoside hydrolase family 46<br>chitosonase                                                                                                                                                                                                                                                                                                                                                                                                                                                                                                       | GH46 (1)                               | GH46 (1)                               |
| Glycoside hydrolase family 55                                                                                                                                                                                                                                                                                                                                                                                                                                                                                                                      | GH55 (1)                               | GH55 (1)                               |

| <b>CAzymes predicted</b>                                                                                                                                                                                                                                                                                                                                                                                                                                                 | <b><i>Streptomyces</i><br/>sp. BT3</b> | <b><i>Streptomyces</i><br/>sp. BT4</b> |
|--------------------------------------------------------------------------------------------------------------------------------------------------------------------------------------------------------------------------------------------------------------------------------------------------------------------------------------------------------------------------------------------------------------------------------------------------------------------------|----------------------------------------|----------------------------------------|
| exo- $\beta$ -1,3-glucanase; endo- $\beta$ -1,3-glucanase                                                                                                                                                                                                                                                                                                                                                                                                                |                                        |                                        |
| Glycoside hydrolase family 62<br>$\alpha$ -L-arabinofuranosidase                                                                                                                                                                                                                                                                                                                                                                                                         | GH62 (1)                               | GH62 (0)                               |
| Glycoside hydrolase family 63<br>processing $\alpha$ -glucosidase; $\alpha$ -1,3-glucosidase; $\alpha$ -glucosidase; mannosylglycerate $\alpha$ -mannosidase / mannosylglycerate hydrolase; glucosylglycerate hydrolase                                                                                                                                                                                                                                                  | GH63 (1)                               | GH63 (1)                               |
| Glycoside hydrolase family 64<br>$\beta$ -1,3-glucanase                                                                                                                                                                                                                                                                                                                                                                                                                  | GH64 (1)                               | GH64 (1)                               |
| Glycoside hydrolase family 65<br>$\alpha$ , $\alpha$ -trehalase; maltose phosphorylase; trehalose phosphorylase; kojibiose phosphorylase; trehalose-6-phosphate phosphorylase; nigerose phosphorylase; 3-O- $\alpha$ -glucopyranosyl-L-rhamnose phosphorylase; 2-O- $\alpha$ -glucopyranosylglycerol: phosphate $\beta$ -glucosyltransferase; $\alpha$ -glucosyl-1,2- $\beta$ -galactosyl-L-hydroxylysine $\alpha$ -glucosidase; 1,3- $\beta$ -oligoglucan phosphorylase | GH65 (4)                               | GH65 (3)                               |
| Glycoside hydrolase family 77<br>amylomaltase or 4- $\alpha$ -glucanotransferase                                                                                                                                                                                                                                                                                                                                                                                         | GH77 (1)                               | GH77 (1)                               |
| Glycoside hydrolase family 81<br>endo- $\beta$ -1,3-glucanase                                                                                                                                                                                                                                                                                                                                                                                                            | GH81 (1)                               | GH81 (1)                               |
| Glycoside hydrolase family 84<br>(N-acetyl $\beta$ -glucosaminidase; hyaluronidase; [protein]-3-O-(GlcNAc)-L-Ser/Thr $\beta$ -N-acetylglucosaminidase                                                                                                                                                                                                                                                                                                                    | GH84 (2)                               | GH84 (2)                               |
| Glycoside hydrolase family 87<br>mycodextranase; $\alpha$ -1,3-glucanase                                                                                                                                                                                                                                                                                                                                                                                                 | GH87 (1)                               | GH87 (1)                               |
| Glycoside hydrolase family 114<br>endo- $\alpha$ -1,4-polygalactosaminidase                                                                                                                                                                                                                                                                                                                                                                                              | GH114 (1)                              | GH114 (1)                              |
| Glycoside hydrolase family 158                                                                                                                                                                                                                                                                                                                                                                                                                                           | GH158 (1)                              | GH158 (1)                              |

| CAzymes predicted                                                                                                                                                                                                                                                                                                                                                                                                                                                                                                                                                                                                                                                                                                                                                                                                                                                                                                                                                                                                                                                                                                                                                                                                                                                                                                                                                                                                                    | <i>Streptomyces</i><br>sp. BT3 | <i>Streptomyces</i><br>sp. BT4 |
|--------------------------------------------------------------------------------------------------------------------------------------------------------------------------------------------------------------------------------------------------------------------------------------------------------------------------------------------------------------------------------------------------------------------------------------------------------------------------------------------------------------------------------------------------------------------------------------------------------------------------------------------------------------------------------------------------------------------------------------------------------------------------------------------------------------------------------------------------------------------------------------------------------------------------------------------------------------------------------------------------------------------------------------------------------------------------------------------------------------------------------------------------------------------------------------------------------------------------------------------------------------------------------------------------------------------------------------------------------------------------------------------------------------------------------------|--------------------------------|--------------------------------|
| endo- $\beta$ -1,3-glucanase                                                                                                                                                                                                                                                                                                                                                                                                                                                                                                                                                                                                                                                                                                                                                                                                                                                                                                                                                                                                                                                                                                                                                                                                                                                                                                                                                                                                         |                                |                                |
| <p>Glycosyltransferase family 1</p> <p>(UDP-glucuronosyltransferase; zeatin O-<math>\beta</math>-xylosyltransferase; 2-hydroxyacylsphingosine 1-<math>\beta</math>-galactosyltransferase; N-acylsphingosine galactosyltransferase; flavonol 3-O-glucosyltransferase; anthocyanidin 3-O-glucosyltransferase; sinapate 1-glucosyltransferase; indole-3-acetate <math>\beta</math>-glucosyltransferase; flavonol L-rhamnosyltransferase; sterol glucosyltransferase; UDP-Glc: 4-hydroxybenzoate 4-O-<math>\beta</math>-glucosyltransferase; zeatin O-<math>\beta</math>-glucosyltransferase; limonoid glucosyltransferase; UDP-GlcA: baicalein 7-O-<math>\beta</math>-glucuronosyltransferase; UDP-Glc: chalcone 4'-O-<math>\beta</math>-glucosyltransferase; ecdysteroid UDP-glucosyltransferase; salicylic acid <math>\beta</math>-glucosyltransferase; anthocyanin 3-O-galactosyltransferase; anthocyanin 5-O-glucosyltransferase; dTDP-<math>\beta</math>-2-deoxy-L-fucose: <math>\alpha</math>-L-2-deoxyfucosyltransferase; UDP-<math>\beta</math>-L-rhamnose: <math>\alpha</math>-L-rhamnosyltransferase; zeaxanthin glucosyltransferase; UDP-Glc: flavone-6-C-glucosyltransferase; UDP-Glc: cinnamate <math>\beta</math>-glucosyltransferase; UDP-Glc: hydroxycinnamic acid O-<math>\beta</math>-glucosyltransferase; UDP-Glc: cinnamoyl O-<math>\beta</math>-glucosyltransferase; UDP-Arap: flavone-C-arabinosyltransferase</p> | GT1 (3)                        | GT1 (3)                        |
| <p>Glycosyltransferase family 2</p> <p>cellulose synthase; chitin synthase; dolichyl-phosphate <math>\beta</math>-D-mannosyltransferase; dolichyl-phosphate <math>\beta</math>-glucosyltransferase; N-acetylglucosaminyltransferase; N-acetylgalactosaminyltransferase; hyaluronan synthase; chitin oligosaccharide synthase; <math>\beta</math>-1,3-glucan synthase; <math>\beta</math>-1,4-mannan synthase; <math>\beta</math>-mannosylphosphodecaprenol-mannooligosaccharide <math>\alpha</math>-1,6-mannosyltransferase; UDP-Galf: rhamnopyranosyl-N-acetylglucosaminyl-PP-decaprenol <math>\beta</math>-1,4/1,5-galactofuranosyltransferase; UDP-Galf: galactofuranosyl-galactofuranosyl-rhamnosyl-N-acetylglucosaminyl-PP-decaprenol <math>\beta</math>-1,5/1,6-galactofuranosyltransferase; dTDP-L-Rha: N-acetylglucosaminyl-PP-decaprenol <math>\alpha</math>-1,3-L-rhamnosyltransferase; alternating <math>\beta</math>-1,3/4-N-acetylmannan synthase</p>                                                                                                                                                                                                                                                                                                                                                                                                                                                                   | GT2 (6)                        | GT2 (5)                        |

| <b>CAzymes predicted</b>                                                                                                                                                                                                                                                                                                                                                                                                                                                                                                                                                                                                                                                                                                                                                                                                                                                                                                                                                                                                                                                                                                                                                                                                                                                                                                                                                                                                              | <b><i>Streptomyces</i><br/>sp. BT3</b> | <b><i>Streptomyces</i><br/>sp. BT4</b> |
|---------------------------------------------------------------------------------------------------------------------------------------------------------------------------------------------------------------------------------------------------------------------------------------------------------------------------------------------------------------------------------------------------------------------------------------------------------------------------------------------------------------------------------------------------------------------------------------------------------------------------------------------------------------------------------------------------------------------------------------------------------------------------------------------------------------------------------------------------------------------------------------------------------------------------------------------------------------------------------------------------------------------------------------------------------------------------------------------------------------------------------------------------------------------------------------------------------------------------------------------------------------------------------------------------------------------------------------------------------------------------------------------------------------------------------------|----------------------------------------|----------------------------------------|
| <p>Glycosyltransferase family 4</p> <p>sucrose synthase; sucrose-phosphate synthase; <math>\alpha</math>-glucosyltransferase; lipopolysaccharide N-acetylglucosaminyltransferase; phosphatidylinositol <math>\alpha</math>-mannosyltransferase; GDP-Man: Man1GlcNAc2-PP-dolichol <math>\alpha</math>-1,3-mannosyltransferase; GDP-Man: Man3GlcNAc2-PP-dolichol/Man4GlcNAc2-PP-dolichol <math>\alpha</math>-1,2-mannosyltransferase; digalactosyldiacylglycerol synthase; 1,2-diacylglycerol 3-glucosyltransferase; diglucosyl diacylglycerol synthase; trehalose phosphorylase; NDP-Glc: <math>\alpha</math>-glucose <math>\alpha</math>-glucosyltransferase / <math>\alpha,\alpha</math>-trehalose synthase; GDP-Man: Man2GlcNAc2-PP-dolichol <math>\alpha</math>-1,6-mannosyltransferase; UDP-GlcNAc: 2-deoxystreptamine <math>\alpha</math>-N-acetylglucosaminyltransferase; UDP-GlcNAc: ribostamycin <math>\alpha</math>-N-acetylglucosaminyltransferase; UDP-Gal <math>\alpha</math>-galactosyltransferase; UDP-Xyl <math>\alpha</math>-xylosyltransferase; UDP-GlcA <math>\alpha</math>-glucuronyltransferase; UDP-Glc <math>\alpha</math>-glucosyltransferase; UDP-GalNAc: GalNAc-PP-Und <math>\alpha</math>-1,3-N-acetylgalactosaminyltransferase; UDP-GalNAc: N,N'-diacetylbaucosaminyl-PP-Und <math>\alpha</math>-1,3-N-acetylgalactosaminyltransferase; ADP-dependent <math>\alpha</math>-maltose-1-phosphate synthase</p> | GT4 (6)                                | GT4 (6)                                |
| <p>Glycosyltransferase family 9</p> <p>lipopolysaccharide N-acetylglucosaminyltransferase; heptosyltransferase</p>                                                                                                                                                                                                                                                                                                                                                                                                                                                                                                                                                                                                                                                                                                                                                                                                                                                                                                                                                                                                                                                                                                                                                                                                                                                                                                                    | GT9 (1)                                | GT9 (2)                                |
| <p>Glycosyltransferase family 20</p> <p><math>\alpha,\alpha</math>-trehalose-phosphate synthase [UDP-forming]; Glucosylglycerol-phosphate synthase; trehalose-6-P phosphatase; [retaining] GDP-valeniol: validamine 7-phosphate valeniolyltransferase</p>                                                                                                                                                                                                                                                                                                                                                                                                                                                                                                                                                                                                                                                                                                                                                                                                                                                                                                                                                                                                                                                                                                                                                                             | GT20 (1)                               | GT20 (1)                               |
| <p>Glycosyltransferase family 28</p> <p>1,2-diacylglycerol 3-<math>\beta</math>-galactosyltransferase; 1,2-diacylglycerol 3-<math>\beta</math>-glucosyltransferase; UDP-GlcNAc: Und-PP-MurAc-pentapeptide <math>\beta</math>-N-acetylglucosaminyltransferase; digalactosyldiacylglycerol synthase</p>                                                                                                                                                                                                                                                                                                                                                                                                                                                                                                                                                                                                                                                                                                                                                                                                                                                                                                                                                                                                                                                                                                                                 | GT28 (2)                               | GT28 (2)                               |
| <p>Glycosyltransferase family 35</p>                                                                                                                                                                                                                                                                                                                                                                                                                                                                                                                                                                                                                                                                                                                                                                                                                                                                                                                                                                                                                                                                                                                                                                                                                                                                                                                                                                                                  | GT35 (1)                               | GT35 (1)                               |

| <b>CAzymes predicted</b>                                                                                                                                                                                                                                                            | <b><i>Streptomyces</i><br/>sp. BT3</b> | <b><i>Streptomyces</i><br/>sp. BT4</b> |
|-------------------------------------------------------------------------------------------------------------------------------------------------------------------------------------------------------------------------------------------------------------------------------------|----------------------------------------|----------------------------------------|
| glycogen or starch phosphorylase                                                                                                                                                                                                                                                    |                                        |                                        |
| Glycosyltransferase family 39<br>(Dol-P-Man: protein $\alpha$ -mannosyltransferase)                                                                                                                                                                                                 | GT39 (1)                               | GT39 (1)                               |
| Glycosyltransferase family 51<br>Murein polymerase                                                                                                                                                                                                                                  | GT51 (4)                               | GT51 (3)                               |
| Glycosyltransferase family 81<br>NDP-Glc: glucosyl-3-phosphoglycerate synthase; NDP-Man: mannosyl-3-phosphoglycerate synthase; ADP-Glc: glucosyl-2-glycerate synthase; mannosyl-3-phosphoglycerate synthase / [retaining] GDP-Man: 3-phosphoglycerate $\alpha$ -mannosyltransferase | GT81 (1)                               | GT81 (1)                               |
| Glycosyltransferase family 87<br>(polyprenol-P-Man: $\alpha$ -1,2-mannosyltransferase)                                                                                                                                                                                              | GT87 (3)                               | GT87 (3)                               |
| Polysaccharide lyase family 31<br>endo- $\beta$ -1,4-glucuronan lyase; poly( $\beta$ -mannuronate) lyase / M-specific alginate lyase                                                                                                                                                | PL31 (1)                               | PL31 (1)                               |
|                                                                                                                                                                                                                                                                                     |                                        |                                        |
